# Supplementary material for: Advances in Mass Rearing Pseudophilothrips ichini (Hood) (Thysanoptera: Phlaeothripidae), a Biological Control Agent for Brazilian Peppertree in Florida
Source: Insects. 2021 Sep 3;12(9):790. doi: 10.3390/insects12090790 (PMC8468526; doi:10.3390/insects12090790)
Supplement: Supplementary file 1 [file insects-12-00790-s001.zip › table-s1.rearing data.xlsx]

## Sheet: Cage data
cage	batch	date in	thrips in	date first harvest	date last harvest	time to harvest	thrips out	fold
box	.	2019-09-18	100	2019-10-30	2019-10-30	42	1045	10.45
box	.	2019-09-18	100	2019-10-30	2019-10-30	42	695	6.95
box	.	2019-09-18	100	2019-10-30	2019-10-30	42	926	9.26
box	.	2019-09-18	100	2019-10-30	2019-10-30	42	1013	10.13
box	.	2019-09-18	100	2019-11-04	2019-11-04	47	31	0.31
box	.	2019-09-18	100	2019-11-04	2019-11-04	47	686	6.86
box	.	2019-09-18	100	2019-11-04	2019-11-04	47	477	4.77
box	1	2019-10-31	100	2019-12-19	2019-12-19	49	651	6.51
box	2	2019-10-31	100	2019-12-23	2019-12-23	53	609	6.09
box	3	2019-10-31	100	2019-12-19	2019-12-19	49	838	8.38
box	4	2019-11-04	100	2019-12-23	2019-12-23	49	1232	12.32
box	5	2019-11-04	100	2019-12-23	2019-12-23	49	797	7.97
box	6	2019-11-04	100	2019-12-23	2019-12-23	49	1076	10.76
box	7	2019-11-04	100	2019-12-23	2019-12-23	49	803	8.03
box	8	2019-11-04	100	2019-12-23	2019-12-23	49	1035	10.35
box	43	2019-12-19	100	2020-01-29	2020-02-03	41	553	5.53
box	44	2019-12-19	100	2020-01-29	2020-02-03	41	263	2.63
box	45	2019-12-19	100	2020-01-29	2020-02-03	41	557	5.57
box	46	2019-12-19	100	2020-01-29	2020-02-03	41	572	5.72
box	47	2019-12-23	100	2020-02-03	2020-02-07	42	550	5.5
box	48	2019-12-23	100	2020-02-03	2020-02-07	42	300	3
box	49	2019-12-23	100	2020-01-27	2020-02-07	35	331	3.31
box	50	2019-12-23	100	2020-01-27	2020-02-07	35	460	4.6
box	76	2020-02-03	100	2020-03-13	2020-03-18	39	417	4.17
box	77	2020-02-03	100	2020-03-13	2020-03-19	39	1256	12.56
box	78	2020-02-03	100	2020-03-16	2020-03-20	42	920	9.2
box	79	2020-02-03	100	2020-03-19	2020-03-20	45	992	9.92
box	85	2020-02-10	100	2020-03-20	2020-03-27	39	620	6.2
box	86	2020-02-10	100	2020-03-20	2020-03-27	39	696	6.96
box	87	2020-02-10	100	2020-03-20	2020-03-27	39	610	6.1
box	88	2020-02-10	100	2020-03-20	2020-03-30	39	779	7.79
box	114	2020-03-19	100	2020-05-18	2020-05-26	60	810	8.1
box	115	2020-03-19	100	2020-05-18	2020-05-29	60	1280	12.8
box	116	2020-03-19	100	2020-05-19	2020-05-29	61	1110	11.1
box	117	2020-03-19	100	2020-05-27	2020-05-29	69	870	8.7
box	123	2020-03-27	100	2020-05-29	2020-06-02	63	380	3.8
box	124	2020-03-27	100	2020-05-29	2020-06-02	63	800	8
box	125	2020-03-27	100	2020-05-29	2020-06-02	63	550	5.5
box	126	2020-03-27	100	2020-06-02	2020-06-04	67	780	7.8
box	142	2020-05-29	100	2020-07-07	2020-07-22	39	607	6.07
box	143	2020-05-29	100	2020-07-07	2020-07-14	39	27	0.27
box	144	2020-05-29	100	2020-07-07	2020-07-21	39	239	2.39
box	148	2020-06-04	100	2020-07-09	2020-07-23	35	159	1.59
box	149	2020-06-04	100	2020-07-09	2020-07-23	35	59	0.59
box	150	2020-06-04	100	2020-07-09	2020-07-23	35	457	4.57
box	151	2020-06-04	100	2020-07-15	2020-07-23	41	834	8.34
box	155	2020-07-13	100	2020-08-28	2020-08-31	46	1032	10.32
box	156	2020-07-13	100	2020-08-28	2020-08-31	46	640	6.4
box	157	2020-07-13	100	2020-09-01	2020-09-01	50	452	4.52
box	158	2020-07-13	100	2020-08-31	2020-09-01	49	1185	11.85
box	159	2020-07-13	100	2020-09-02	2020-09-02	51	1255	12.55
box	160	2020-07-13	100	2020-09-02	2020-09-02	51	545	5.45
box	167	2020-07-29	100	2020-08-24	2020-09-16	26	245	2.45
box	174	2020-09-01	100	2020-10-09	2020-10-20	38	623	6.23
box	175	2020-09-01	100	2020-10-22	2020-10-22	51	303	3.03
box	176	2020-09-01	100	2020-10-20	2020-10-20	49	456	4.56
box	177	2020-09-17	100	2020-10-28	2020-11-05	41	486	4.86
box	178	2020-09-17	100	2020-10-28	2020-11-05	41	219	2.19
box	179	2020-09-17	100	2020-10-28	2020-11-18	41	441	4.41
box	180	2020-09-17	100	2020-10-28	2020-11-18	41	531	5.31
box	190	2020-10-23	100	2020-12-08	2020-12-08	46	2	0.02
box	191	2020-10-23	100	2020-11-25	2020-12-08	33	628	6.28
box	192	2020-10-23	100	2020-11-24	2020-12-28	32	819	8.19
box	193	2020-10-30	100	2020-12-02	2020-12-08	33	939	9.39
box	194	2020-10-30	100	2020-12-08	2020-12-08	39	1	0.01
box	198	2020-11-25	100	2021-01-06	2021-01-13	42	768	7.68
box	199	2020-11-25	100	2021-01-06	2021-01-13	42	596	5.96
box	208	2020-12-14	100	2021-01-27	2021-02-02	44	1362	13.62
box	209	2020-12-14	100	2021-02-02	2021-02-02	50	606	6.06
box	210	2020-12-29	100	2021-02-04	2021-02-11	37	152	1.52
box	211	2020-12-29	100	2021-01-27	2021-02-23	29	417	4.17
box	212	2020-12-29	100	2021-02-18	2021-02-23	51	805	8.05
box	213	2021-01-07	100	2021-02-24	2021-02-24	48	625	6.25
box	214	2021-01-07	100	2021-02-17	2021-02-21	41	961	9.61
box	223	2021-02-10	100	2021-03-16	2021-03-23	34	74	0.74
box	228	2021-02-25	100	2021-03-29	2021-04-01	32	119	1.19
box	229	2021-02-25	100	2021-03-29	2021-04-01	32	419	4.19
box	230	2021-02-25	100	2021-03-29	2021-04-07	32	555	5.55
box	231	2021-02-25	100	2021-04-01	2021-04-12	35	543	5.43
box	232	2021-03-08	100	2021-04-12	2021-04-26	35	920	9.2
box	233	2021-03-08	100	2021-04-12	2021-04-26	35	944	9.44
box	240	2021-03-25	100	2021-05-03	2021-05-11	39	765	7.65
box	241	2021-03-25	100	2021-05-04	2021-05-11	40	738	7.38
box	242	2021-03-25	100	2021-05-14	2021-05-14	50	577	5.77
box	243	2021-04-06	100	2021-05-21	2021-05-24	45	988	9.88
box	244	2021-04-06	100	2021-05-24	2021-05-28	48	950	9.5
box	249	2021-04-13	100	2021-05-17	2021-06-02	34	1673	16.73
box	250	2021-04-13	100	2021-05-17	2021-05-20	34	758	7.58
box	251	2021-04-30	100	2021-06-03	2021-06-08	34	1277	12.77
box	252	2021-04-30	100	2021-06-07	2021-06-08	38	788	7.88
box	253	2021-05-14	100	2021-06-22	2021-07-07	39	1834	18.34
cylinder	.	2019-08-26	40	2019-10-02	2019-10-02	37	180	4.5
cylinder	.	2019-08-26	40	2019-10-02	2019-10-02	37	52	1.3
cylinder	.	2019-08-26	40	2019-10-02	2019-10-02	37	108	2.7
cylinder	.	2019-08-26	40	2019-10-02	2019-10-02	37	220	5.5
cylinder	.	2019-09-06	30	2019-10-25	2019-10-25	49	396	13.2
cylinder	.	2019-09-06	30	2019-10-27	2019-10-27	51	591	19.7
cylinder	.	2019-09-06	30	2019-10-27	2019-10-27	51	285	9.5
cylinder	.	2019-09-06	30	2019-10-30	2019-10-30	54	593	19.7667
cylinder	.	2019-10-07	30	2019-11-25	2019-11-25	49	635	21.1667
cylinder	.	2019-10-07	40	2019-11-25	2019-11-25	49	210	5.25
cylinder	.	2019-10-07	40	2019-11-25	2019-11-25	49	38	0.95
cylinder	.	2019-10-07	40	2019-11-25	2019-11-25	49	331	8.275
cylinder	.	2019-10-11	40	2019-11-25	2019-11-25	45	65	1.625
cylinder	.	2019-10-11	40	2019-12-09	2019-12-09	59	305	7.625
cylinder	.	2019-10-11	40	2019-12-09	2019-12-09	59	81	2.025
cylinder	.	2019-10-11	40	2019-12-09	2019-12-09	59	200	5
cylinder	.	2019-10-11	40	2019-12-11	2019-12-11	61	217	5.425
cylinder	.	2019-10-18	40	2019-12-11	2019-12-11	54	239	5.975
cylinder	.	2019-10-18	40	2019-12-11	2019-12-11	54	534	13.35
cylinder	.	2019-10-18	40	2019-12-11	2019-12-11	54	341	8.525
cylinder	9	2019-11-15	30	2019-12-27	2020-01-06	42	78	2.6
cylinder	10	2019-11-15	30	2019-12-27	2020-01-03	42	121	4.03333
cylinder	11	2019-11-15	30	2019-12-27	2020-01-06	42	99	3.3
cylinder	12	2019-11-15	30	2019-12-27	2020-01-06	42	263	8.76667
cylinder	13	2019-11-25	50	2019-12-30	2020-01-08	35	508	10.16
cylinder	14	2019-11-25	50	2019-12-30	2020-01-08	35	701	14.02
cylinder	15	2019-11-25	50	2019-12-30	2020-01-08	35	801	16.02
cylinder	16	2019-11-25	50	2019-12-30	2020-01-08	35	631	12.62
cylinder	17	2019-11-25	50	2019-12-30	2020-01-08	35	453	9.06
cylinder	18	2019-11-25	50	2019-12-30	2020-01-08	35	334	6.68
cylinder	19	2019-11-25	50	2019-12-30	2020-01-08	35	661	13.22
cylinder	20	2019-11-25	50	2019-12-30	2020-01-08	35	217	4.34
cylinder	21	2019-11-25	50	2019-12-30	2020-01-08	35	180	3.6
cylinder	22	2019-11-25	50	2019-12-30	2020-01-06	35	312	6.24
cylinder	23	2019-11-29	50	2020-01-03	2020-01-13	35	546	10.92
cylinder	24	2019-11-29	50	2020-01-03	2020-01-08	35	533	10.66
cylinder	25	2019-11-29	50	2020-01-03	2020-01-03	35	8	0.16
cylinder	26	2019-11-29	50	2020-01-03	2020-01-13	35	791	15.82
cylinder	27	2019-11-29	50	2020-01-03	2020-01-03	35	9	0.18
cylinder	28	2019-12-02	30	2020-01-13	2020-01-15	42	232	7.73333
cylinder	29	2019-12-02	30	2020-01-13	2020-01-15	42	27	0.9
cylinder	30	2019-12-02	30	2020-01-13	2020-01-15	42	13	0.433333
cylinder	31	2019-12-02	30	2020-01-13	2020-01-15	42	120	4
cylinder	32	2019-12-02	30	2020-01-13	2020-01-15	42	30	1
cylinder	33	2019-12-11	40	2020-01-15	2020-01-27	35	237	5.925
cylinder	34	2019-12-11	40	2020-01-15	2020-01-24	35	66	1.65
cylinder	35	2019-12-11	40	2020-01-15	2020-01-24	35	40	1
cylinder	36	2019-12-11	40	2020-01-15	2020-01-24	35	26	0.65
cylinder	37	2019-12-11	40	2020-01-15	2020-01-24	35	175	4.375
cylinder	38	2019-12-18	30	2020-01-24	2020-01-27	37	29	0.966667
cylinder	39	2019-12-18	30	2020-01-24	2020-01-29	37	115	3.83333
cylinder	40	2019-12-18	30	2020-01-24	2020-01-31	37	319	10.6333
cylinder	41	2019-12-18	30	2020-01-24	2020-01-31	37	378	12.6
cylinder	42	2019-12-18	30	2020-01-24	2020-01-29	37	178	5.93333
cylinder	51	2019-12-27	50	2020-02-03	2020-02-07	38	356	7.12
cylinder	52	2019-12-27	50	2020-02-03	2020-02-07	38	237	4.74
cylinder	53	2019-12-27	50	2020-02-03	2020-02-12	38	476	9.52
cylinder	54	2019-12-27	50	2020-02-03	2020-02-12	38	360	7.2
cylinder	55	2019-12-27	50	2020-02-03	2020-02-12	38	397	7.94
cylinder	56	2019-12-30	30	2020-02-03	2020-02-12	35	709	23.6333
cylinder	57	2019-12-30	30	2020-02-03	2020-02-07	35	109	3.63333
cylinder	58	2019-12-30	30	2020-02-03	2020-02-12	35	819	27.3
cylinder	59	2019-12-30	30	2020-02-03	2020-02-07	35	186	6.2
cylinder	60	2019-12-30	30	2020-02-03	2020-02-07	35	235	7.83333
cylinder	61	2020-01-13	50	2020-02-21	2020-03-03	39	475	9.5
cylinder	62	2020-01-13	50	2020-02-21	2020-02-26	39	40	0.8
cylinder	63	2020-01-13	50	2020-02-21	2020-02-26	39	230	4.6
cylinder	64	2020-01-13	50	2020-02-21	2020-02-26	39	205	4.1
cylinder	65	2020-01-13	50	2020-02-21	2020-02-26	39	376	7.52
cylinder	66	2020-01-24	50	2020-03-03	2020-03-11	39	1242	24.84
cylinder	67	2020-01-24	50	2020-02-26	2020-03-09	33	667	13.34
cylinder	68	2020-01-24	50	2020-03-05	2020-03-11	41	505	10.1
cylinder	69	2020-01-24	50	2020-03-05	2020-03-11	41	525	10.5
cylinder	70	2020-01-24	50	2020-02-26	2020-03-11	33	528	10.56
cylinder	71	2020-02-03	50	2020-03-12	2020-03-18	38	476	9.52
cylinder	72	2020-02-03	50	2020-03-12	2020-03-19	38	496	9.92
cylinder	73	2020-02-03	50	2020-03-12	2020-03-19	38	529	10.58
cylinder	74	2020-02-03	50	2020-03-12	2020-03-19	38	612	12.24
cylinder	75	2020-02-03	50	2020-03-12	2020-03-19	38	839	16.78
cylinder	80	2020-02-07	50	2020-03-20	2020-03-27	42	1461	29.22
cylinder	81	2020-02-07	50	2020-03-20	2020-03-23	42	300	6
cylinder	82	2020-02-07	50	2020-03-20	2020-03-27	42	1422	28.44
cylinder	83	2020-02-07	50	2020-03-20	2020-03-25	42	578	11.56
cylinder	84	2020-02-07	50	2020-03-20	2020-03-20	42	3	0.06
cylinder	89	2020-02-14	50	2020-02-27	2020-03-31	13	367	7.34
cylinder	90	2020-02-14	50	2020-03-30	2020-03-30	45	10	0.2
cylinder	91	2020-02-14	50	2020-02-27	2020-03-31	13	790	15.8
cylinder	92	2020-02-14	50	2020-02-27	2020-03-31	13	668	13.36
cylinder	93	2020-02-14	50	2020-03-30	2020-04-02	45	820	16.4
cylinder	94	2020-02-21	50	2020-03-31	2020-04-09	39	709	14.18
cylinder	95	2020-02-21	50	2020-03-31	2020-04-17	39	713	14.26
cylinder	96	2020-02-21	50	2020-04-01	2020-04-17	40	891	17.82
cylinder	97	2020-02-21	50	2020-04-01	2020-04-17	40	659	13.18
cylinder	98	2020-02-21	50	2020-04-01	2020-04-09	40	184	3.68
cylinder	99	2020-02-26	30	2020-04-02	2020-04-17	36	859	28.6333
cylinder	100	2020-02-26	30	2020-04-02	2020-04-17	36	353	11.7667
cylinder	101	2020-02-26	30	2020-04-02	2020-04-17	36	343	11.4333
cylinder	102	2020-02-26	30	2020-04-02	2020-04-10	36	289	9.63333
cylinder	103	2020-02-26	30	2020-04-02	2020-05-05	36	140	4.66667
cylinder	104	2020-03-06	30	2020-04-06	2020-05-05	31	135	4.5
cylinder	105	2020-03-06	30	2020-04-06	2020-05-05	31	190	6.33333
cylinder	106	2020-03-06	30	2020-04-06	2020-04-06	31	20	0.666667
cylinder	107	2020-03-06	30	2020-04-06	2020-05-05	31	270	9
cylinder	108	2020-03-06	30	2020-05-05	2020-05-05	60	316	10.5333
cylinder	109	2020-03-12	40	2020-05-06	2020-05-06	55	245	6.125
cylinder	110	2020-03-12	40	2020-05-06	2020-05-06	55	8	0.2
cylinder	111	2020-03-12	40	2020-05-06	2020-05-06	55	905	22.625
cylinder	112	2020-03-12	40	2020-05-06	2020-05-06	55	176	4.4
cylinder	113	2020-03-12	40	2020-05-07	2020-05-07	56	202	5.05
cylinder	118	2020-03-20	30	2020-05-08	2020-05-08	49	230	7.66667
cylinder	119	2020-03-20	20	2020-05-15	2020-05-15	56	278	13.9
cylinder	120	2020-03-20	40	2020-05-13	2020-05-13	54	680	17
cylinder	121	2020-03-20	40	2020-05-15	2020-05-15	56	533	13.325
cylinder	122	2020-03-20	40	2020-05-13	2020-05-13	54	34	0.85
cylinder	127	2020-03-31	30	2020-05-21	2020-05-21	51	189	6.3
cylinder	128	2020-03-31	40	2020-05-21	2020-05-21	51	207	5.175
cylinder	129	2020-03-31	40	2020-05-21	2020-05-21	51	363	9.075
cylinder	130	2020-03-31	50	2020-05-21	2020-05-21	51	312	6.24
cylinder	131	2020-03-31	40	2020-05-21	2020-05-21	51	621	15.525
cylinder	132	2020-04-03	20	2020-05-21	2020-05-21	48	69	3.45
cylinder	133	2020-04-03	30	2020-05-21	2020-05-21	48	289	9.63333
cylinder	134	2020-04-03	40	2020-05-21	2020-05-21	48	293	7.325
cylinder	135	2020-04-03	20	2020-05-21	2020-05-21	48	207	10.35
cylinder	136	2020-04-03	30	2020-05-21	2020-05-21	48	432	14.4
cylinder	137	2020-04-09	30	2020-05-21	2020-05-21	42	454	15.1333
cylinder	138	2020-04-09	30	2020-05-27	2020-06-02	48	297	9.9
cylinder	139	2020-04-09	20	2020-05-21	2020-05-21	42	180	9
cylinder	140	2020-04-09	40	2020-05-27	2020-06-02	48	308	7.7
cylinder	141	2020-04-09	30	2020-06-02	2020-06-02	54	180	6
cylinder	145	2020-05-29	30	2020-07-10	2020-07-22	42	411	13.7
cylinder	146	2020-05-29	30	2020-07-10	2020-07-22	42	485	16.1667
cylinder	147	2020-05-29	30	2020-07-10	2020-07-22	42	600	20
cylinder	152	2020-06-04	30	2020-07-23	2020-08-04	49	417	13.9
cylinder	153	2020-06-04	30	2020-07-29	2020-08-04	55	260	8.66667
cylinder	154	2020-06-04	30	2020-07-29	2020-08-04	55	0	0
cylinder	161	2020-07-16	25	2020-08-25	2020-08-31	40	586	23.44
cylinder	162	2020-07-16	20	2020-08-26	2020-08-31	41	249	12.45
cylinder	163	2020-07-16	30	2020-08-25	2020-08-31	40	276	9.2
cylinder	164	2020-07-29	30	2020-09-11	2020-09-11	44	607	20.2333
cylinder	165	2020-07-29	30	2020-09-11	2020-09-11	44	473	15.7667
cylinder	166	2020-07-29	30	2020-09-11	2020-09-11	44	600	20
cylinder	168	2020-08-14	30	2020-09-29	2020-10-06	46	487	16.2333
cylinder	169	2020-08-14	30	2020-10-15	2020-10-15	62	1100	36.6667
cylinder	170	2020-08-14	30	2020-10-09	2020-10-15	56	614	20.4667
cylinder	171	2020-08-24	30	2020-10-15	2020-10-15	52	438	14.6
cylinder	172	2020-08-24	30	2020-10-15	2020-10-15	52	593	19.7667
cylinder	173	2020-08-24	30	2020-10-15	2020-10-16	52	1077	35.9
cylinder	181	2020-09-29	30	2020-11-03	2020-11-18	35	338	11.2667
cylinder	182	2020-09-29	30	2020-11-12	2020-11-18	44	166	5.53333
cylinder	183	2020-09-29	30	2020-11-12	2020-11-18	44	217	7.23333
cylinder	184	2020-10-09	30	2020-11-12	2020-11-20	34	122	4.06667
cylinder	185	2020-10-09	30	2020-11-18	2020-12-01	40	546	18.2
cylinder	186	2020-10-09	30	2020-11-18	2020-12-01	40	400	13.3333
cylinder	187	2020-10-15	30	2020-11-19	2020-12-02	35	241	8.03333
cylinder	188	2020-10-15	30	2020-11-19	2020-12-02	35	97	3.23333
cylinder	189	2020-10-15	30	2020-11-19	2020-12-02	35	213	7.1
cylinder	195	2020-11-20	30	2020-12-22	2021-01-06	32	691	23.0333
cylinder	196	2020-11-20	30	2020-12-22	2021-01-06	32	359	11.9667
cylinder	197	2020-11-20	30	2020-12-22	2021-01-06	32	679	22.6333
cylinder	200	2020-12-02	30	2021-01-19	2021-02-01	48	442	14.7333
cylinder	201	2020-12-02	30	2021-01-19	2021-02-01	48	467	15.5667
cylinder	202	2020-12-02	40	2021-01-19	2021-02-01	48	241	6.025
cylinder	203	2020-12-02	30	2021-01-20	2021-01-20	49	188	6.26667
cylinder	204	2020-12-02	30	2021-01-20	2021-02-01	49	595	19.8333
cylinder	205	2020-12-02	30	2021-01-20	2021-02-01	49	682	22.7333
cylinder	206	2020-12-02	30	2021-01-21	2021-02-01	50	206	6.86667
cylinder	207	2020-12-02	30	2021-02-02	2021-02-02	62	84	2.8
cylinder	215	2021-01-20	20	2021-03-08	2021-03-09	47	536	26.8
cylinder	216	2021-01-20	30	2021-03-09	2021-03-09	48	0	0
cylinder	217	2021-01-20	20	2021-03-09	2021-03-09	48	153	7.65
cylinder	218	2021-01-20	30	2021-03-09	2021-03-09	48	0	0
cylinder	219	2021-01-20	30	2021-03-09	2021-03-09	48	192	6.4
cylinder	220	2021-01-20	30	2021-03-09	2021-03-09	48	509	16.9667
cylinder	221	2021-01-20	20	2021-03-11	2021-03-16	50	319	15.95
cylinder	222	2021-01-20	30	2021-03-10	2021-03-16	49	107	3.56667
cylinder	224	2021-02-18	30	2021-03-22	2021-03-25	32	12	0.4
cylinder	225	2021-02-18	20	2021-03-22	2021-03-29	32	51	2.55
cylinder	226	2021-02-18	20	2021-03-23	2021-03-29	33	174	8.7
cylinder	227	2021-02-18	20	2021-03-29	2021-04-01	39	55	2.75
cylinder	234	2021-03-11	30	2021-04-22	2021-04-26	42	203	6.76667
cylinder	235	2021-03-11	20	2021-04-22	2021-04-26	42	162	8.1
cylinder	236	2021-03-11	30	2021-04-22	2021-04-26	42	524	17.4667
cylinder	237	2021-03-11	30	2021-04-22	2021-04-26	42	593	19.7667
cylinder	238	2021-03-25	20	2021-05-03	2021-05-14	39	160	8
cylinder	239	2021-03-25	20	2021-05-03	2021-05-14	39	680	34
cylinder	245	2021-04-09	30	2021-05-28	2021-06-07	49	882	29.4
cylinder	246	2021-04-09	30	2021-05-28	2021-05-28	49	632	21.0667
cylinder	247	2021-04-12	25	2021-06-01	2021-06-03	50	178	7.12
cylinder	248	2021-04-12	30	2021-06-01	2021-06-03	50	471	15.7
screen	1	2019-12-20	1500	2020-02-04	2020-02-21	46	10781	7.18733
screen	2	2020-01-08	1500	2020-02-26	2020-03-11	49	13200	8.8
screen	3	2020-02-21	1500	2020-03-27	2020-04-27	35	30415	20.2767
screen	4	2020-03-10	1500	2020-04-14	2020-05-14	35	25275	16.85
screen	5	2020-03-16	1500	2020-04-23	2020-05-15	38	22901	15.2673
screen	6	2020-04-24	1500	2020-05-26	2020-06-11	32	19585	13.0567
screen	7	2020-05-01	1500	2020-05-28	2020-06-26	27	33978	22.652
screen	8	2020-05-01	1500	2020-06-10	2020-06-26	40	13419	8.946
screen	9	2020-05-14	1500	2020-06-26	2020-07-14	43	8919	5.946
screen	10	2020-05-18	1500	2020-06-26	2020-07-14	39	6438	4.292
screen	12	2020-05-26	1500	2020-07-24	2020-08-04	59	11307	7.538
screen	11	2020-06-12	1500	2020-07-15	2020-07-29	33	8199	5.466
screen	13	2020-07-08	1500	2020-07-31	2020-08-12	23	17500	11.6667
screen	14	2020-07-16	1500	2020-08-12	2020-08-19	27	13308	8.872
screen	15	2020-07-23	1500	2020-08-18	2020-08-26	26	9935	6.62333
screen	16	2020-07-29	1500	2020-08-24	2020-09-03	26	4486	2.99067
screen	17	2020-08-05	1500	2020-09-03	2020-09-10	29	8550	5.7
screen	18	2020-08-13	1500	2020-09-08	2020-09-17	26	19767	13.178
screen	19	2020-08-20	1500	2020-09-15	2020-09-30	26	16865	11.2433
screen	20	2020-08-27	1500	2020-09-23	2020-10-01	27	16729	11.1527
screen	21	2020-09-03	1500	2020-09-29	2020-10-07	26	16294	10.8627
screen	22	2020-09-10	1500	2020-10-07	2020-10-20	27	14814	9.876
screen	23	2020-09-17	1500	2020-10-14	2020-10-22	27	12863	8.57533
screen	24	2020-09-24	1500	2020-10-20	2020-10-29	26	12130	8.08667
screen	25	2020-10-01	1500	2020-10-28	2020-11-05	27	10951	7.30067
screen	26	2020-10-08	1500	2020-11-04	2020-11-12	27	4767	3.178
screen	27	2020-10-15	1500	2020-11-12	2020-11-19	28	6078	4.052
screen	28	2020-10-22	1500	2020-11-18	2020-11-25	27	8998	5.99867
screen	29	2020-10-29	1500	2020-11-23	2020-12-10	25	12355	8.23667
screen	30	2020-11-05	1500	2020-12-07	2020-12-17	32	9903	6.602
screen	31	2020-11-12	1500	2020-12-14	2021-01-06	32	3848	2.56533
screen	32	2020-11-19	1500	2020-12-17	2021-01-07	28	12593	8.39533
screen	33	2020-11-25	1500	2020-12-29	2021-01-14	34	3903	2.602
screen	34	2020-12-10	1500	2021-01-07	2021-01-28	28	5087	3.39133
screen	35	2020-12-17	1500	2021-01-25	2021-02-04	39	6229	4.15267
screen	36	2020-12-23	1500	2021-02-02	2021-02-11	41	4362	2.908
screen	37	2020-12-31	1500	2021-02-10	2021-02-18	41	3952	2.63467
screen	38	2021-01-07	1500	2021-02-16	2021-02-25	40	13836	9.224
screen	39	2021-01-14	1500	2021-02-17	2021-03-04	34	16335	10.89
screen	40	2021-01-28	1500	2021-02-25	2021-03-11	28	4337	2.89133
screen	41	2021-02-04	1500	2021-03-16	2021-03-22	40	9958	6.63867
screen	42	2021-02-11	1500	2021-03-22	2021-03-30	39	1962	1.308
screen	43	2021-02-18	1500	2021-03-23	2021-04-01	33	10293	6.862
screen	44	2021-02-25	1500	2021-03-31	2021-04-08	34	14336	9.55733
screen	45	2021-03-04	1500	2021-04-09	2021-04-14	36	14603	9.73533
screen	46	2021-03-11	1500	2021-04-14	2021-04-22	34	16306	10.8707
screen	47	2021-03-18	1500	2021-04-22	2021-04-29	35	22614	15.076
screen	48	2021-03-25	1500	2021-04-26	2021-05-05	32	16019	10.6793
screen	49	2021-04-01	1500	2021-05-05	2021-05-13	34	25486	16.9907
screen	50	2021-04-08	1500	2021-05-10	2021-05-19	32	24161	16.1073
screen	51	2021-04-15	1500	2021-05-14	2021-05-27	29	32285	21.5233
screen	52	2021-04-22	1500	2021-05-24	2021-06-03	32	18367	12.2447
screen	53	2021-04-29	1500	2021-06-02	2021-06-10	34	22488	14.992
screen	54	2021-05-06	1500	2021-06-04	2021-06-17	29	24563	16.3753

## Sheet: iButton data
date and time	cage temp C	cage % RH
2020-10-14 16:53:01	29.581	72.195
2020-10-14 17:53:01	29.081	78.17
2020-10-14 18:53:01	28.081	83.97
2020-10-14 19:53:01	27.082	86.035
2020-10-14 20:53:01	26.582	87.568
2020-10-14 21:53:01	26.082	87.059
2020-10-14 22:53:01	26.082	89.089
2020-10-14 23:53:01	25.082	90.596
2020-10-15 00:53:01	24.582	90.095
2020-10-15 01:53:01	24.582	90.095
2020-10-15 02:53:01	24.582	91.096
2020-10-15 03:53:01	24.582	90.596
2020-10-15 04:53:01	24.582	91.594
2020-10-15 05:53:01	24.582	91.096
2020-10-15 06:53:01	24.582	91.594
2020-10-15 07:53:01	24.582	91.594
2020-10-15 08:53:01	27.082	90.095
2020-10-15 09:53:01	28.081	89.593
2020-10-15 10:53:01	29.581	73.294
2020-10-15 11:53:01	29.581	69.42
2020-10-15 12:53:01	30.08	68.3
2020-10-15 13:53:01	30.58	76.558
2020-10-15 14:53:01	30.58	79.238
2020-10-15 15:53:01	29.581	88.583
2020-10-15 16:53:01	29.081	89.593
2020-10-15 17:53:01	28.081	91.096
2020-10-15 18:53:01	27.582	91.096
2020-10-15 19:53:01	27.582	91.594
2020-10-15 20:53:01	27.582	93.079
2020-10-15 21:53:01	27.582	92.09
2020-10-15 22:53:01	27.082	92.09
2020-10-15 23:53:01	26.582	91.594
2020-10-16 00:53:01	26.582	91.594
2020-10-16 01:53:01	26.082	92.09
2020-10-16 02:53:01	26.082	91.594
2020-10-16 03:53:01	26.082	92.585
2020-10-16 04:53:01	26.082	92.585
2020-10-16 05:53:01	25.582	92.09
2020-10-16 06:53:01	26.082	92.585
2020-10-16 07:53:01	25.582	92.585
2020-10-16 08:53:01	25.582	91.594
2020-10-16 09:53:01	25.582	80.3
2020-10-16 10:53:01	30.08	73.842
2020-10-16 11:53:01	31.579	67.738
2020-10-16 12:53:01	32.078	67.738
2020-10-16 13:53:01	29.581	67.174
2020-10-16 14:53:01	28.581	69.978
2020-10-16 15:53:01	27.082	67.738
2020-10-16 16:53:01	24.082	68.3
2020-10-16 17:53:01	23.582	72.745
2020-10-16 18:53:01	24.082	73.842
2020-10-16 19:53:01	24.082	74.388
2020-10-16 20:53:01	23.582	76.018
2020-10-16 21:53:01	24.082	76.558
2020-10-16 22:53:01	24.082	79.238
2020-10-16 23:53:01	24.082	87.568
2020-10-17 00:53:01	24.582	87.059
2020-10-17 01:53:01	24.082	83.45
2020-10-17 02:53:01	24.082	81.881
2020-10-17 03:53:01	24.582	85.005
2020-10-17 04:53:01	24.582	85.521
2020-10-17 05:53:01	24.582	85.521
2020-10-17 06:53:01	24.582	87.059
2020-10-17 07:53:01	24.582	86.547
2020-10-17 08:53:01	25.582	83.45
2020-10-17 09:53:01	29.081	77.097
2020-10-17 10:53:01	29.581	73.294
2020-10-17 11:53:01	30.08	66.609
2020-10-17 12:53:01	30.58	63.762
2020-10-17 13:53:01	30.08	64.905
2020-10-17 14:53:01	29.581	68.861
2020-10-17 15:53:01	29.581	67.738
2020-10-17 16:53:01	29.081	68.861
2020-10-17 17:53:01	28.081	73.294
2020-10-17 18:53:01	27.582	74.933
2020-10-17 19:53:01	27.082	74.933
2020-10-17 20:53:01	27.082	77.634
2020-10-17 21:53:01	26.582	79.77
2020-10-17 22:53:01	27.082	80.828
2020-10-17 23:53:01	25.582	81.881
2020-10-18 00:53:01	25.582	80.828
2020-10-18 01:53:01	26.582	82.928
2020-10-18 02:53:01	26.582	83.45
2020-10-18 03:53:01	26.082	85.005
2020-10-18 04:53:01	26.082	90.596
2020-10-18 05:53:01	26.082	88.583
2020-10-18 06:53:01	25.582	85.521
2020-10-18 07:53:01	26.082	93.571
2020-10-18 08:53:01	26.082	91.096
2020-10-18 09:53:01	28.581	88.077
2020-10-18 10:53:01	29.081	87.059
2020-10-18 11:53:01	31.079	87.059
2020-10-18 12:53:01	30.58	87.059
2020-10-18 13:53:01	30.58	78.705
2020-10-18 14:53:01	30.08	81.356
2020-10-18 15:53:01	29.581	85.005
2020-10-18 16:53:01	29.581	81.881
2020-10-18 17:53:01	28.581	82.928
2020-10-18 18:53:01	27.582	92.09
2020-10-18 19:53:01	27.582	93.079
2020-10-18 20:53:01	27.082	93.079
2020-10-18 21:53:01	27.082	92.585
2020-10-18 22:53:01	27.082	92.09
2020-10-18 23:53:01	27.082	93.079
2020-10-19 00:53:01	27.082	92.585
2020-10-19 01:53:01	26.582	91.096
2020-10-19 02:53:01	26.582	91.096
2020-10-19 03:53:01	26.082	90.596
2020-10-19 04:53:01	25.082	93.079
2020-10-19 05:53:01	25.582	87.568
2020-10-19 06:53:01	26.082	90.596
2020-10-19 07:53:01	24.082	86.547
2020-10-19 08:53:01	23.582	85.005
2020-10-19 09:53:01	25.582	91.594
2020-10-19 10:53:01	26.082	89.593
2020-10-19 11:53:01	26.082	86.035
2020-10-19 12:53:01	27.082	80.828
2020-10-19 13:53:01	27.582	85.005
2020-10-19 14:53:01	27.082	79.77
2020-10-19 15:53:01	27.082	85.005
2020-10-19 16:53:01	27.082	88.077
2020-10-19 17:53:01	27.082	90.095
2020-10-19 18:53:01	23.582	92.09
2020-10-19 19:53:01	23.582	92.585
2020-10-19 20:53:01	23.082	92.585
2020-10-19 21:53:01	24.082	95.039
2020-10-19 22:53:01	24.582	94.551
2020-10-19 23:53:01	24.582	94.062
2020-10-20 00:53:01	24.582	94.551
2020-10-20 01:53:01	24.582	95.039
2020-10-20 02:53:01	25.082	95.526
2020-10-20 03:53:01	25.582	93.571
2020-10-20 04:53:01	25.082	95.526
2020-10-20 05:53:01	25.582	95.526
2020-10-20 06:53:01	26.082	94.551
2020-10-20 07:53:01	26.582	94.551
2020-10-20 08:53:01	26.582	93.571
2020-10-20 09:53:01	25.082	94.551
2020-10-20 10:53:01	26.582	95.526
2020-10-20 11:53:01	27.082	96.011
2020-10-20 12:53:01	28.081	96.494
2020-10-20 13:53:01	27.082	96.494
2020-10-20 14:53:01	28.081	96.494
2020-10-20 15:53:01	25.582	96.494
2020-10-20 16:53:01	26.082	95.526
2020-10-20 17:53:01	25.082	95.526
2020-10-20 18:53:01	25.582	94.551
2020-10-20 19:53:01	24.582	95.526
2020-10-20 20:53:01	22.582	95.039
2020-10-20 21:53:01	23.082	94.551
2020-10-20 22:53:01	23.582	93.079
2020-10-20 23:53:01	23.082	94.551
2020-10-21 00:53:01	23.582	93.571
2020-10-21 01:53:01	23.582	94.551
2020-10-21 02:53:01	24.082	93.571
2020-10-21 03:53:01	22.582	93.571
2020-10-21 04:53:01	23.582	94.062
2020-10-21 05:53:01	23.582	94.062
2020-10-21 06:53:01	23.582	93.571
2020-10-21 07:53:01	23.082	94.551
2020-10-21 08:53:01	23.082	94.062
2020-10-21 09:53:01	23.082	95.039
2020-10-21 10:53:01	23.082	93.079
2020-10-21 11:53:01	23.582	83.97
2020-10-21 12:53:01	23.582	81.356
2020-10-21 13:53:01	24.082	77.097
2020-10-21 14:53:01	24.082	72.745
2020-10-21 15:53:01	24.582	77.634
2020-10-21 16:53:01	23.582	80.3
2020-10-21 17:53:01	23.582	78.705
2020-10-21 18:53:01	22.582	81.356
2020-10-21 19:53:01	22.582	82.928
2020-10-21 20:53:01	23.082	85.005
2020-10-21 21:53:01	23.582	83.97
2020-10-21 22:53:01	24.082	89.593
2020-10-21 23:53:01	23.582	90.596
2020-10-22 00:53:01	23.582	90.095
2020-10-22 01:53:01	23.082	89.593
2020-10-22 02:53:01	22.081	88.583
2020-10-22 03:53:01	22.582	85.005
2020-10-22 04:53:01	23.082	87.059
2020-10-22 05:53:01	23.082	89.089
2020-10-22 06:53:01	23.082	87.059
2020-10-22 07:53:01	23.582	84.488
2020-10-22 08:53:01	23.582	82.406
2020-10-22 09:53:01	24.082	71.643
2020-10-22 10:53:01	25.582	68.3
2020-10-22 11:53:01	27.582	71.089
2020-10-22 12:53:01	28.081	69.978
2020-10-22 13:53:01	28.581	71.089
2020-10-22 14:53:01	29.081	80.3
2020-10-22 15:53:01	27.582	76.018
2020-10-22 16:53:01	27.082	74.933
2020-10-22 17:53:01	27.582	76.558
2020-10-22 18:53:01	26.582	81.356
2020-10-22 19:53:01	26.582	81.356
2020-10-22 20:53:01	26.082	83.45
2020-10-22 21:53:01	25.582	83.45
2020-10-22 22:53:01	25.082	82.928
2020-10-22 23:53:01	25.082	82.406
2020-10-23 00:53:01	24.582	87.059
2020-10-23 01:53:01	25.082	88.077
2020-10-23 02:53:01	24.582	86.035
2020-10-23 03:53:01	25.082	87.568
2020-10-23 04:53:01	25.082	86.547
2020-10-23 05:53:01	25.082	88.077
2020-10-23 06:53:01	25.082	87.568
2020-10-23 07:53:01	25.082	85.521
2020-10-23 08:53:01	26.582	87.568
2020-10-23 09:53:01	28.581	76.018
2020-10-23 10:53:01	29.581	69.978
2020-10-23 11:53:01	29.081	69.42
2020-10-23 12:53:01	29.581	71.643
2020-10-23 13:53:01	29.581	72.745
2020-10-23 14:53:01	28.081	76.018
2020-10-23 15:53:01	27.082	78.17
2020-10-23 16:53:01	27.582	82.928
2020-10-23 17:53:01	27.082	86.035
2020-10-23 18:53:01	26.582	90.596
2020-10-23 19:53:01	26.082	91.594
2020-10-23 20:53:01	26.082	91.594
2020-10-23 21:53:01	26.082	92.09
2020-10-23 22:53:01	26.082	91.594
2020-10-23 23:53:01	25.582	93.571
2020-10-24 00:53:01	25.582	93.571
2020-10-24 01:53:01	25.082	92.585
2020-10-24 02:53:01	25.082	94.062
2020-10-24 03:53:01	25.082	92.09
2020-10-24 04:53:01	25.082	93.571
2020-10-24 05:53:01	25.082	93.079
2020-10-24 06:53:01	25.082	93.571
2020-10-24 07:53:01	25.082	94.062
2020-10-24 08:53:01	25.582	93.571
2020-10-24 09:53:01	28.081	91.594
2020-10-24 10:53:01	29.581	92.09
2020-10-24 11:53:01	29.581	93.079
2020-10-24 12:53:01	29.581	93.079
2020-10-24 13:53:01	30.08	89.593
2020-10-24 14:53:01	29.081	93.079
2020-10-24 15:53:01	29.081	87.568
2020-10-24 16:53:01	28.081	87.568
2020-10-24 17:53:01	27.582	90.095
2020-10-24 18:53:01	25.582	91.594
2020-10-24 19:53:01	25.082	92.585
2020-10-24 20:53:01	25.582	94.062
2020-10-24 21:53:01	25.082	92.585
2020-10-24 22:53:01	25.082	92.09
2020-10-24 23:53:01	24.582	93.079
2020-10-25 00:53:01	23.582	94.551
2020-10-25 01:53:01	23.582	93.079
2020-10-25 02:53:01	23.582	94.062
2020-10-25 03:53:01	24.082	92.09
2020-10-25 04:53:01	23.582	93.079
2020-10-25 05:53:01	23.582	95.039
2020-10-25 06:53:01	24.082	93.571
2020-10-25 07:53:01	24.582	92.09
2020-10-25 08:53:01	25.582	93.571
2020-10-25 09:53:01	26.582	86.035
2020-10-25 10:53:01	25.582	83.45
2020-10-25 11:53:01	24.582	77.097
2020-10-25 12:53:01	26.082	76.018
2020-10-25 13:53:01	27.582	73.842
2020-10-25 14:53:01	27.082	74.933
2020-10-25 15:53:01	28.081	74.388
2020-10-25 16:53:01	27.582	83.45
2020-10-25 17:53:01	27.082	85.521
2020-10-25 18:53:01	26.582	87.059
2020-10-25 19:53:01	26.582	89.593
2020-10-25 20:53:01	24.582	90.095
2020-10-25 21:53:01	25.082	89.593
2020-10-25 22:53:01	25.082	91.096
2020-10-25 23:53:01	24.582	90.596
2020-10-26 00:53:01	24.082	90.095
2020-10-26 01:53:01	23.582	92.09
2020-10-26 02:53:01	24.082	89.593
2020-10-26 03:53:01	24.082	90.596
2020-10-26 04:53:01	24.582	92.09
2020-10-26 05:53:01	24.582	92.585
2020-10-26 06:53:01	24.582	92.585
2020-10-26 07:53:01	24.582	92.585
2020-10-26 08:53:01	26.582	89.089
2020-10-26 09:53:01	28.581	81.881
2020-10-26 10:53:01	28.581	76.018
2020-10-26 11:53:01	30.08	72.195
2020-10-26 12:53:01	30.58	71.089
2020-10-26 13:53:01	30.08	72.195
2020-10-26 14:53:01	30.08	73.294
2020-10-26 15:53:01	30.08	74.933
2020-10-26 16:53:01	28.081	76.018
2020-10-26 17:53:01	28.081	78.705
2020-10-26 18:53:01	27.082	83.97
2020-10-26 19:53:01	26.582	86.035
2020-10-26 20:53:01	26.582	87.059
2020-10-26 21:53:01	26.582	88.077
2020-10-26 22:53:01	26.582	89.089
2020-10-26 23:53:01	26.082	90.095
2020-10-27 00:53:01	26.082	90.596
2020-10-27 01:53:01	26.082	90.596
2020-10-27 02:53:01	26.082	89.089
2020-10-27 03:53:01	25.582	90.095
2020-10-27 04:53:01	26.082	90.095
2020-10-27 05:53:01	26.082	90.596
2020-10-27 06:53:01	25.582	92.09
2020-10-27 07:53:01	26.082	90.095
2020-10-27 08:53:01	27.582	89.593
2020-10-27 09:53:01	29.081	79.238
2020-10-27 10:53:01	30.08	79.77
2020-10-27 11:53:01	30.08	73.294
2020-10-27 12:53:01	30.08	70.534
2020-10-27 13:53:01	30.08	68.3
2020-10-27 14:53:01	30.08	72.195
2020-10-27 15:53:01	29.581	73.842
2020-10-27 16:53:01	29.081	77.097
2020-10-27 17:53:01	28.081	78.705
2020-10-27 18:53:01	27.582	83.45
2020-10-27 19:53:01	27.082	85.521
2020-10-27 20:53:01	26.582	85.005
2020-10-27 21:53:01	26.582	86.547
2020-10-27 22:53:01	26.582	87.568
2020-10-27 23:53:01	26.582	87.568
2020-10-28 00:53:01	26.582	85.521
2020-10-28 01:53:01	26.582	86.547
2020-10-28 02:53:01	26.582	87.059
2020-10-28 03:53:01	26.082	88.077
2020-10-28 04:53:01	26.082	88.583
2020-10-28 05:53:01	26.082	89.089
2020-10-28 06:53:01	25.582	90.596
2020-10-28 07:53:01	26.082	90.095
2020-10-28 08:53:01	26.582	86.547
2020-10-28 09:53:01	28.581	77.097
2020-10-28 10:53:01	29.081	72.745
2020-10-28 11:53:01	30.08	73.842
2020-10-28 12:53:01	31.079	69.978
2020-10-28 13:53:01	30.08	65.475
2020-10-28 14:53:01	30.08	68.3
2020-10-28 15:53:01	29.581	71.643
2020-10-28 16:53:01	29.081	79.238
2020-10-28 17:53:01	28.581	85.005
2020-10-28 18:53:01	27.582	89.089
2020-10-28 19:53:01	27.082	88.583
2020-10-28 20:53:01	27.082	89.089
2020-10-28 21:53:01	27.082	91.096
2020-10-28 22:53:01	27.082	91.594
2020-10-28 23:53:01	27.082	91.594
2020-10-29 00:53:01	26.582	92.09
2020-10-29 01:53:01	26.582	93.079
2020-10-29 02:53:01	26.582	92.09
2020-10-29 03:53:01	26.582	93.079
2020-10-29 04:53:01	26.582	93.571
2020-10-29 05:53:01	26.082	93.079
2020-10-29 06:53:01	26.082	92.585
2020-10-29 07:53:01	26.082	93.571
2020-10-29 08:53:01	27.582	91.594
2020-10-29 09:53:01	29.581	82.928
2020-10-29 10:53:01	30.58	77.097
2020-10-29 11:53:01	30.08	69.42
2020-10-29 12:53:01	31.079	67.738
2020-10-29 13:53:01	31.579	77.634
2020-10-29 14:53:01	31.579	74.933
2020-10-29 15:53:01	30.58	84.488
2020-10-29 16:53:01	29.081	82.928
2020-10-29 17:53:01	26.582	79.77
2020-10-29 18:53:01	27.082	83.97
2020-10-29 19:53:01	26.582	88.077
2020-10-29 20:53:01	26.582	87.568
2020-10-29 21:53:01	26.082	88.077
2020-10-29 22:53:01	26.082	88.077
2020-10-29 23:53:01	26.082	89.089
2020-10-30 00:53:01	25.582	92.09
2020-10-30 01:53:01	25.582	92.09
2020-10-30 02:53:01	25.082	92.585
2020-10-30 03:53:01	25.582	93.571
2020-10-30 04:53:01	25.082	93.571
2020-10-30 05:53:01	25.082	93.571
2020-10-30 06:53:01	24.582	94.062
2020-10-30 07:53:01	25.082	94.062
2020-10-30 08:53:01	26.582	93.571
2020-10-30 09:53:01	29.081	93.079
2020-10-30 10:53:01	29.581	91.594
2020-10-30 11:53:01	31.079	86.547
2020-10-30 12:53:01	31.079	92.09
2020-10-30 13:53:01	29.581	93.079
2020-10-30 14:53:01	30.58	90.596
2020-10-30 15:53:01	28.581	86.547
2020-10-30 16:53:01	28.081	91.594
2020-10-30 17:53:01	28.581	90.095
2020-10-30 18:53:01	27.582	92.585
2020-10-30 19:53:01	26.582	92.585
2020-10-30 20:53:01	26.082	93.079
2020-10-30 21:53:01	26.082	91.096
2020-10-30 22:53:01	25.582	91.594
2020-10-30 23:53:01	26.082	92.09
2020-10-31 00:53:01	25.082	91.594
2020-10-31 01:53:01	25.082	93.571
2020-10-31 02:53:01	25.082	93.571
2020-10-31 03:53:01	24.582	94.062
2020-10-31 04:53:01	24.582	94.062
2020-10-31 05:53:01	24.582	94.062
2020-10-31 06:53:01	24.582	93.571
2020-10-31 07:53:01	24.582	91.594
2020-10-31 08:53:01	24.582	83.45
2020-10-31 09:53:01	24.582	80.828
2020-10-31 10:53:01	27.082	77.634
2020-10-31 11:53:01	27.582	76.558
2020-10-31 12:53:01	26.082	73.294
2020-10-31 13:53:01	26.082	72.745
2020-10-31 14:53:01	26.582	76.018
2020-10-31 15:53:01	27.582	78.705
2020-10-31 16:53:01	26.582	83.45
2020-10-31 17:53:01	26.582	85.005
2020-10-31 18:53:01	25.082	87.059
2020-10-31 19:53:01	25.082	88.583
2020-10-31 20:53:01	25.582	89.593
2020-10-31 21:53:01	25.582	91.594
2020-10-31 22:53:01	26.082	92.585
2020-10-31 23:53:01	25.582	94.551
2020-11-01 00:53:01	25.082	92.585
2020-11-01 01:53:01	24.582	92.585
2020-11-01 02:53:01	24.582	93.079
2020-11-01 03:53:01	24.582	92.09
2020-11-01 04:53:01	24.582	93.079
2020-11-01 05:53:01	24.582	94.062
2020-11-01 06:53:01	24.582	93.079
2020-11-01 07:53:01	25.082	89.089
2020-11-01 08:53:01	26.082	82.406
2020-11-01 09:53:01	28.581	79.77
2020-11-01 10:53:01	28.581	77.634
2020-11-01 11:53:01	29.081	77.097
2020-11-01 12:53:01	29.081	72.745
2020-11-01 13:53:01	30.08	73.294
2020-11-01 14:53:01	30.08	68.861
2020-11-01 15:53:01	29.081	69.978
2020-11-01 16:53:01	28.581	68.3
2020-11-01 17:53:01	27.582	68.861
2020-11-01 18:53:01	27.082	69.42
2020-11-01 19:53:01	26.582	69.42
2020-11-01 20:53:01	26.582	69.42
2020-11-01 21:53:01	26.082	70.534
2020-11-01 22:53:01	25.582	69.978
2020-11-01 23:53:01	25.082	67.174
2020-11-02 00:53:01	25.082	67.738
2020-11-02 01:53:01	25.082	67.174
2020-11-02 02:53:01	25.082	67.174
2020-11-02 03:53:01	25.082	68.861
2020-11-02 04:53:01	25.082	66.609
2020-11-02 05:53:01	25.082	71.643
2020-11-02 06:53:01	24.582	69.42
2020-11-02 07:53:01	24.082	65.475
2020-11-02 08:53:01	24.582	63.762
2020-11-02 09:53:01	25.582	64.334
2020-11-02 10:53:01	25.582	60.297
2020-11-02 11:53:01	25.582	57.369
2020-11-02 12:53:01	26.082	63.188
2020-11-02 13:53:01	25.582	58.545
2020-11-02 14:53:01	25.082	58.545
2020-11-02 15:53:01	25.082	62.036
2020-11-02 16:53:01	24.082	63.762
2020-11-02 17:53:01	23.582	64.334
2020-11-02 18:53:01	22.582	69.42
2020-11-02 19:53:01	22.582	66.609
2020-11-02 20:53:01	22.081	69.978
2020-11-02 21:53:01	22.081	64.905
2020-11-02 22:53:01	22.081	71.089
2020-11-02 23:53:01	22.081	64.334
2020-11-03 00:53:01	22.582	69.42
2020-11-03 01:53:01	22.081	67.738
2020-11-03 02:53:01	22.081	66.043
2020-11-03 03:53:01	21.581	67.738
2020-11-03 04:53:01	21.581	70.534
2020-11-03 05:53:01	21.581	70.534
2020-11-03 06:53:01	21.081	68.3
2020-11-03 07:53:01	21.581	64.905
2020-11-03 08:53:01	22.582	65.475
2020-11-03 09:53:01	24.082	62.036
2020-11-03 10:53:01	24.582	64.334
2020-11-03 11:53:01	25.082	62.613
2020-11-03 12:53:01	25.082	65.475
2020-11-03 13:53:01	25.082	67.174
2020-11-03 14:53:01	25.082	68.861
2020-11-03 15:53:01	24.582	70.534
2020-11-03 16:53:01	24.082	72.195
2020-11-03 17:53:01	24.082	76.018
2020-11-03 18:53:01	23.082	74.933
2020-11-03 19:53:01	23.082	76.018
2020-11-03 20:53:01	23.082	78.17
2020-11-03 21:53:01	23.082	77.097
2020-11-03 22:53:01	23.082	75.476
2020-11-03 23:53:01	23.082	83.45
2020-11-04 00:53:01	22.582	80.828
2020-11-04 01:53:01	22.582	80.3
2020-11-04 02:53:01	22.582	83.97
2020-11-04 03:53:01	22.582	84.488
2020-11-04 04:53:01	22.582	84.488
2020-11-04 05:53:01	22.582	83.97
2020-11-04 06:53:01	22.582	84.488
2020-11-04 07:53:01	22.582	93.079
2020-11-04 08:53:01	23.582	90.596
2020-11-04 09:53:01	25.082	86.547
2020-11-04 10:53:01	26.082	80.3
2020-11-04 11:53:01	26.082	79.77
2020-11-04 12:53:01	26.582	89.089
2020-11-04 13:53:01	26.582	85.005
2020-11-04 14:53:01	26.082	92.09
2020-11-04 15:53:01	26.082	92.09
2020-11-04 16:53:01	25.582	84.488
2020-11-04 17:53:01	25.082	82.928
2020-11-04 18:53:01	24.582	81.881
2020-11-04 19:53:01	24.582	83.97
2020-11-04 20:53:01	24.582	87.568
2020-11-04 21:53:01	24.582	89.089
2020-11-04 22:53:01	25.082	88.583
2020-11-04 23:53:01	25.082	86.547
2020-11-05 00:53:01	24.582	87.059
2020-11-05 01:53:01	25.082	88.077
2020-11-05 02:53:01	25.082	88.583
2020-11-05 03:53:01	25.082	87.568
2020-11-05 04:53:01	25.082	89.089
2020-11-05 05:53:01	25.082	90.095
2020-11-05 06:53:01	25.082	86.547
2020-11-05 07:53:01	25.082	88.583
2020-11-05 08:53:01	24.082	85.005
2020-11-05 09:53:01	25.082	79.77
2020-11-05 10:53:01	26.082	76.018
2020-11-05 11:53:01	27.582	78.17
2020-11-05 12:53:01	27.582	87.059
2020-11-05 13:53:01	25.582	82.928
2020-11-05 14:53:01	26.582	90.596
2020-11-05 15:53:01	25.082	90.596
2020-11-05 16:53:01	25.082	91.594
2020-11-05 17:53:01	25.082	90.596
2020-11-05 18:53:01	25.082	88.583
2020-11-05 19:53:01	24.582	83.45
2020-11-05 20:53:01	25.082	93.571
2020-11-05 21:53:01	25.082	92.585
2020-11-05 22:53:01	24.582	91.096
2020-11-05 23:53:01	24.582	88.077
2020-11-06 00:53:01	24.582	86.035
2020-11-06 01:53:01	24.582	92.585
2020-11-06 02:53:01	24.582	93.571
2020-11-06 03:53:01	24.082	94.062
2020-11-06 04:53:01	24.082	85.521
2020-11-06 05:53:01	24.082	83.45
2020-11-06 06:53:01	24.082	82.928
2020-11-06 07:53:01	24.582	85.005
2020-11-06 08:53:01	25.082	82.928
2020-11-06 09:53:01	26.082	79.77
2020-11-06 10:53:01	27.082	80.3
2020-11-06 11:53:01	27.582	92.09
2020-11-06 12:53:01	27.582	92.09
2020-11-06 13:53:01	26.082	88.077
2020-11-06 14:53:01	26.582	93.079
2020-11-06 15:53:01	25.582	92.585
2020-11-06 16:53:01	25.582	93.571
2020-11-06 17:53:01	24.582	93.571
2020-11-06 18:53:01	24.582	94.551
2020-11-06 19:53:01	25.082	94.062
2020-11-06 20:53:01	24.582	91.096
2020-11-06 21:53:01	24.082	93.079
2020-11-06 22:53:01	24.082	94.062
2020-11-06 23:53:01	24.082	94.551
2020-11-07 00:53:01	25.082	95.039
2020-11-07 01:53:01	25.082	95.526
2020-11-07 02:53:01	23.082	96.011
2020-11-07 03:53:01	22.582	94.551
2020-11-07 04:53:01	24.082	93.571
2020-11-07 05:53:01	25.082	94.062
2020-11-07 06:53:01	25.082	94.062
2020-11-07 07:53:01	25.082	95.526
2020-11-07 08:53:01	25.582	95.039
2020-11-07 09:53:01	26.082	96.011
2020-11-07 10:53:01	26.582	96.011
2020-11-07 11:53:01	27.082	94.062
2020-11-07 12:53:01	25.582	95.039
2020-11-07 13:53:01	25.082	93.571
2020-11-07 14:53:01	26.082	95.039
2020-11-07 15:53:01	23.582	95.526
2020-11-07 16:53:01	24.582	96.011
2020-11-07 17:53:01	22.582	96.494
2020-11-07 18:53:01	22.081	96.976
2020-11-07 19:53:01	22.582	96.976
2020-11-07 20:53:01	24.082	96.976
2020-11-07 21:53:01	25.082	97.457
2020-11-07 22:53:01	22.582	96.494
2020-11-07 23:53:01	22.582	96.976
2020-11-08 00:53:01	22.582	96.976
2020-11-08 01:53:01	22.582	96.011
2020-11-08 02:53:01	23.082	95.039
2020-11-08 03:53:01	23.582	94.062
2020-11-08 04:53:01	23.582	94.551
2020-11-08 05:53:01	23.582	94.062
2020-11-08 06:53:01	23.582	94.062
2020-11-08 07:53:01	23.582	94.551
2020-11-08 08:53:01	23.582	93.571
2020-11-08 09:53:01	23.582	92.09
2020-11-08 10:53:01	24.082	92.09
2020-11-08 11:53:01	24.082	84.488
2020-11-08 12:53:01	24.582	83.97
2020-11-08 13:53:01	24.082	85.521
2020-11-08 14:53:01	24.082	85.521
2020-11-08 15:53:01	23.582	86.547
2020-11-08 16:53:01	23.582	89.089
2020-11-08 17:53:01	23.582	91.096
2020-11-08 18:53:01	23.582	92.09
2020-11-08 19:53:01	23.082	90.095
2020-11-08 20:53:01	23.582	93.571
2020-11-08 21:53:01	23.582	93.079
2020-11-08 22:53:01	22.582	94.062
2020-11-08 23:53:01	23.582	92.585
2020-11-09 00:53:01	24.582	92.09
2020-11-09 01:53:01	24.582	92.09
2020-11-09 02:53:01	24.582	91.096
2020-11-09 03:53:01	24.582	91.096
2020-11-09 04:53:01	24.582	91.096
2020-11-09 05:53:01	24.582	91.594
2020-11-09 06:53:01	25.082	91.096
2020-11-09 07:53:01	25.082	90.095
2020-11-09 08:53:01	25.082	83.45
2020-11-09 09:53:01	25.582	81.356
2020-11-09 10:53:01	26.082	82.406
2020-11-09 11:53:01	27.082	81.356
2020-11-09 12:53:01	28.081	80.828
2020-11-09 13:53:01	28.581	79.77
2020-11-09 14:53:01	28.081	85.005
2020-11-09 15:53:01	28.081	83.97
2020-11-09 16:53:01	27.582	87.568
2020-11-09 17:53:01	27.082	90.596
2020-11-09 18:53:01	26.582	88.583
2020-11-09 19:53:01	26.582	88.077
2020-11-09 20:53:01	26.582	87.059
2020-11-09 21:53:01	26.082	87.568
2020-11-09 22:53:01	24.082	88.583
2020-11-09 23:53:01	24.582	89.089
2020-11-10 00:53:01	26.082	87.059
2020-11-10 01:53:01	26.082	89.593
2020-11-10 02:53:01	26.582	87.059
2020-11-10 03:53:01	26.082	88.077
2020-11-10 04:53:01	26.082	88.077
2020-11-10 05:53:01	26.082	86.547
2020-11-10 06:53:01	25.582	86.547
2020-11-10 07:53:01	26.082	81.881
2020-11-10 08:53:01	26.082	77.097
2020-11-10 09:53:01	28.081	72.745
2020-11-10 10:53:01	28.581	64.905
2020-11-10 11:53:01	28.581	69.42
2020-11-10 12:53:01	29.081	63.762
2020-11-10 13:53:01	29.081	62.613
2020-11-10 14:53:01	29.081	67.738
2020-11-10 15:53:01	28.081	73.294
2020-11-10 16:53:01	28.081	80.3
2020-11-10 17:53:01	25.082	85.005
2020-11-10 18:53:01	25.082	87.059
2020-11-10 19:53:01	26.582	93.079
2020-11-10 20:53:01	27.082	93.079
2020-11-10 21:53:01	27.082	94.551
2020-11-10 22:53:01	27.082	94.551
2020-11-10 23:53:01	26.582	93.079
2020-11-11 00:53:01	26.582	94.062
2020-11-11 01:53:01	26.082	93.571
2020-11-11 02:53:01	26.582	93.571
2020-11-11 03:53:01	26.582	94.062
2020-11-11 04:53:01	26.582	94.551
2020-11-11 05:53:01	26.582	93.571
2020-11-11 06:53:01	26.582	94.062
2020-11-11 07:53:01	26.582	90.095
2020-11-11 08:53:01	27.582	76.018
2020-11-11 09:53:01	28.581	88.583
2020-11-11 10:53:01	30.08	91.096
2020-11-11 11:53:01	33.077	90.596
2020-11-11 12:53:01	31.579	90.596
2020-11-11 13:53:01	33.077	89.089
2020-11-11 14:53:01	33.077	90.596
2020-11-11 15:53:01	30.58	86.547
2020-11-11 16:53:01	30.08	89.089
2020-11-11 17:53:01	28.081	93.079
2020-11-11 18:53:01	27.082	92.09
2020-11-11 19:53:01	27.082	93.571
2020-11-11 20:53:01	23.582	94.062
2020-11-11 21:53:01	24.082	93.079
2020-11-11 22:53:01	24.082	93.571
2020-11-11 23:53:01	24.082	94.062
2020-11-12 00:53:01	24.082	93.571
2020-11-12 01:53:01	24.582	94.062
2020-11-12 02:53:01	24.582	93.571
2020-11-12 03:53:01	24.582	94.062
2020-11-12 04:53:01	24.582	94.062
2020-11-12 05:53:01	24.582	94.062
2020-11-12 06:53:01	24.582	93.079
2020-11-12 07:53:01	24.582	94.062
2020-11-12 08:53:01	26.582	92.09
2020-11-12 09:53:01	31.579	84.488
2020-11-12 10:53:01	28.081	81.881
2020-11-12 11:53:01	27.082	76.558
2020-11-12 12:53:01	27.582	76.018
2020-11-12 13:53:01	27.582	82.406
2020-11-12 14:53:01	28.081	85.005
2020-11-12 15:53:01	26.582	83.45
2020-11-12 16:53:01	26.582	85.521
2020-11-12 17:53:01	26.082	86.547
2020-11-12 18:53:01	25.582	88.583
2020-11-12 19:53:01	25.582	91.096
2020-11-12 20:53:01	25.082	92.585
2020-11-12 21:53:01	24.582	93.079
2020-11-12 22:53:01	24.582	93.079
2020-11-12 23:53:01	24.582	93.571
2020-11-13 00:53:01	24.082	93.571
2020-11-13 01:53:01	24.082	94.062
2020-11-13 02:53:01	24.082	93.571
2020-11-13 03:53:01	23.582	95.039
2020-11-13 04:53:01	23.582	94.062
2020-11-13 05:53:01	23.582	94.062
2020-11-13 06:53:01	23.582	95.039
2020-11-13 07:53:01	24.082	94.551
2020-11-13 08:53:01	24.082	90.095
2020-11-13 09:53:01	25.582	83.45
2020-11-13 10:53:01	28.081	76.558
2020-11-13 11:53:01	28.081	86.035
2020-11-13 12:53:01	29.581	89.593
2020-11-13 13:53:01	29.581	91.096
2020-11-13 14:53:01	28.081	82.928
2020-11-13 15:53:01	27.582	82.928
2020-11-13 16:53:01	27.082	85.521
2020-11-13 17:53:01	26.082	90.095
2020-11-13 18:53:01	26.082	87.568
2020-11-13 19:53:01	25.582	92.09
2020-11-13 20:53:01	25.082	92.585
2020-11-13 21:53:01	24.582	93.571
2020-11-13 22:53:01	24.582	93.079
2020-11-13 23:53:01	24.582	90.596
2020-11-14 00:53:01	24.082	89.593
2020-11-14 01:53:01	23.582	91.594
2020-11-14 02:53:01	23.582	91.594
2020-11-14 03:53:01	23.582	91.594
2020-11-14 04:53:01	23.582	94.062
2020-11-14 05:53:01	23.582	94.062
2020-11-14 06:53:01	23.582	94.551
2020-11-14 07:53:01	24.082	94.062
2020-11-14 08:53:01	25.082	85.005
2020-11-14 09:53:01	27.082	75.476
2020-11-14 10:53:01	28.081	72.745
2020-11-14 11:53:01	28.581	69.42
2020-11-14 12:53:01	27.582	74.933
2020-11-14 13:53:01	26.582	74.388
2020-11-14 14:53:01	26.582	70.534
2020-11-14 15:53:01	27.582	75.476
2020-11-14 16:53:01	27.582	76.018
2020-11-14 17:53:01	26.582	82.928
2020-11-14 18:53:01	26.082	81.356
2020-11-14 19:53:01	25.582	83.45
2020-11-14 20:53:01	24.582	88.583
2020-11-14 21:53:01	24.582	91.594
2020-11-14 22:53:01	24.082	92.09
2020-11-14 23:53:01	24.582	93.079
2020-11-15 00:53:01	25.082	93.571
2020-11-15 01:53:01	25.082	94.062
2020-11-15 02:53:01	24.582	93.079
2020-11-15 03:53:01	24.582	94.551
2020-11-15 04:53:01	24.582	94.551
2020-11-15 05:53:01	23.582	93.571
2020-11-15 06:53:01	23.582	93.571
2020-11-15 07:53:01	24.082	94.551
2020-11-15 08:53:01	24.582	87.568
2020-11-15 09:53:01	27.082	80.828
2020-11-15 10:53:01	29.081	67.174
2020-11-15 11:53:01	29.081	63.762
2020-11-15 12:53:01	30.08	65.475
2020-11-15 13:53:01	28.581	67.174
2020-11-15 14:53:01	29.081	67.738
2020-11-15 15:53:01	28.581	66.043
2020-11-15 16:53:01	28.081	72.745
2020-11-15 17:53:01	27.582	81.881
2020-11-15 18:53:01	26.082	82.928
2020-11-15 19:53:01	25.082	84.488
2020-11-15 20:53:01	24.582	89.593
2020-11-15 21:53:01	24.082	90.596
2020-11-15 22:53:01	23.582	92.09
2020-11-15 23:53:01	23.582	92.585
2020-11-16 00:53:01	23.582	92.585
2020-11-16 01:53:01	23.082	93.079
2020-11-16 02:53:01	23.082	93.079
2020-11-16 03:53:01	23.082	93.571
2020-11-16 04:53:01	22.582	94.062
2020-11-16 05:53:01	22.582	92.585
2020-11-16 06:53:01	22.582	93.079
2020-11-16 07:53:01	22.081	94.062
2020-11-16 08:53:01	23.582	92.09
2020-11-16 09:53:01	26.582	91.594
2020-11-16 10:53:01	28.081	87.568
2020-11-16 11:53:01	28.581	80.3
2020-11-16 12:53:01	29.081	76.558
2020-11-16 13:53:01	29.081	73.842
2020-11-16 14:53:01	28.081	69.42
2020-11-16 15:53:01	28.081	70.534
2020-11-16 16:53:01	27.582	72.195
2020-11-16 17:53:01	27.082	72.195
2020-11-16 18:53:01	25.582	74.388
2020-11-16 19:53:01	25.082	75.476
2020-11-16 20:53:01	24.582	76.558
2020-11-16 21:53:01	25.082	79.77
2020-11-16 22:53:01	24.582	80.3
2020-11-16 23:53:01	24.582	82.928
2020-11-17 00:53:01	24.082	85.005
2020-11-17 01:53:01	24.082	86.547
2020-11-17 02:53:01	24.082	85.005
2020-11-17 03:53:01	24.082	85.005
2020-11-17 04:53:01	23.582	86.035
2020-11-17 05:53:01	24.082	89.089
2020-11-17 06:53:01	23.582	90.095
2020-11-17 07:53:01	23.082	73.294
2020-11-17 08:53:01	23.582	64.334
2020-11-17 09:53:01	24.082	63.188
2020-11-17 10:53:01	25.082	61.458
2020-11-17 11:53:01	25.582	64.905
2020-11-17 12:53:01	27.082	60.297
2020-11-17 13:53:01	27.082	60.878
2020-11-17 14:53:01	27.582	60.297
2020-11-17 15:53:01	27.082	64.334
2020-11-17 16:53:01	26.582	65.475
2020-11-17 17:53:01	25.582	66.609
2020-11-17 18:53:01	24.082	64.334
2020-11-17 19:53:01	23.082	66.609
2020-11-17 20:53:01	22.582	65.475
2020-11-17 21:53:01	22.081	66.609
2020-11-17 22:53:01	21.581	63.188
2020-11-17 23:53:01	21.081	63.762
2020-11-18 00:53:01	20.58	61.458
2020-11-18 01:53:01	20.58	63.188
2020-11-18 02:53:01	20.08	61.458
2020-11-18 03:53:01	20.08	68.3
2020-11-18 04:53:01	20.08	63.762
2020-11-18 05:53:01	20.08	62.036
2020-11-18 06:53:01	19.58	64.334
2020-11-18 07:53:01	19.079	67.174
2020-11-18 08:53:01	22.081	61.458
2020-11-18 09:53:01	24.082	57.958
2020-11-18 10:53:01	25.082	63.188
2020-11-18 11:53:01	26.082	66.043
2020-11-18 12:53:01	25.082	65.475
2020-11-18 13:53:01	25.582	64.905
2020-11-18 14:53:01	25.082	62.613
2020-11-18 15:53:01	25.082	62.613
2020-11-18 16:53:01	24.582	64.905
2020-11-18 17:53:01	24.082	66.043
2020-11-18 18:53:01	23.082	71.089
2020-11-18 19:53:01	23.082	72.195
2020-11-18 20:53:01	23.082	74.388
2020-11-18 21:53:01	23.082	74.933
2020-11-18 22:53:01	22.582	74.933
2020-11-18 23:53:01	23.082	77.634
2020-11-19 00:53:01	22.582	79.238
2020-11-19 01:53:01	22.582	75.476
2020-11-19 02:53:01	22.582	75.476
2020-11-19 03:53:01	22.081	77.634
2020-11-19 04:53:01	22.081	85.521
2020-11-19 05:53:01	22.582	89.593
2020-11-19 06:53:01	22.081	82.406
2020-11-19 07:53:01	22.081	77.634
2020-11-19 08:53:01	23.082	70.534
2020-11-19 09:53:01	24.082	66.043
2020-11-19 10:53:01	25.582	67.174
2020-11-19 11:53:01	26.082	67.174
2020-11-19 12:53:01	26.082	78.17
2020-11-19 13:53:01	26.082	76.018
2020-11-19 14:53:01	25.082	79.238
2020-11-19 15:53:01	25.082	77.634
2020-11-19 16:53:01	25.082	76.018
2020-11-19 17:53:01	24.082	76.558
2020-11-19 18:53:01	23.582	75.476
2020-11-19 19:53:01	23.582	74.388
2020-11-19 20:53:01	23.082	75.476
2020-11-19 21:53:01	23.082	76.018
2020-11-19 22:53:01	23.082	77.634
2020-11-19 23:53:01	23.082	79.238
2020-11-20 00:53:01	23.082	81.881
2020-11-20 01:53:01	23.082	82.406
2020-11-20 02:53:01	23.082	81.881
2020-11-20 03:53:01	23.082	82.406
2020-11-20 04:53:01	22.582	85.521
2020-11-20 05:53:01	22.081	86.547
2020-11-20 06:53:01	21.081	88.077
2020-11-20 07:53:01	22.081	90.596
2020-11-20 08:53:01	23.082	77.097
2020-11-20 09:53:01	25.082	69.978
2020-11-20 10:53:01	26.082	64.905
2020-11-20 11:53:01	26.082	67.174
2020-11-20 12:53:01	26.082	68.861
2020-11-20 13:53:01	25.582	72.195
2020-11-20 14:53:01	25.082	72.195
2020-11-20 15:53:01	24.582	73.294
2020-11-20 16:53:01	24.582	75.476
2020-11-20 17:53:01	24.582	77.634
2020-11-20 18:53:01	24.082	78.705
2020-11-20 19:53:01	24.082	80.828
2020-11-20 20:53:01	24.582	79.77
2020-11-20 21:53:01	24.082	82.406
2020-11-20 22:53:01	24.082	83.45
2020-11-20 23:53:01	23.582	85.521
2020-11-21 00:53:01	23.582	88.077
2020-11-21 01:53:01	23.582	91.096
2020-11-21 02:53:01	23.582	92.585
2020-11-21 03:53:01	23.082	94.551
2020-11-21 04:53:01	23.582	94.062
2020-11-21 05:53:01	23.082	93.079
2020-11-21 06:53:01	22.582	93.571
2020-11-21 07:53:01	22.081	94.062
2020-11-21 08:53:01	22.582	94.062
2020-11-21 09:53:01	25.582	93.571
2020-11-21 10:53:01	26.582	94.551
2020-11-21 11:53:01	27.082	95.039
2020-11-21 12:53:01	27.582	92.09
2020-11-21 13:53:01	27.582	92.585
2020-11-21 14:53:01	27.082	92.585
2020-11-21 15:53:01	26.582	91.096
2020-11-21 16:53:01	26.082	90.596
2020-11-21 17:53:01	25.582	93.571
2020-11-21 18:53:01	24.582	94.551
2020-11-21 19:53:01	24.582	94.551
2020-11-21 20:53:01	24.082	94.551
2020-11-21 21:53:01	24.082	95.039
2020-11-21 22:53:01	24.082	95.039
2020-11-21 23:53:01	23.582	95.039
2020-11-22 00:53:01	23.582	93.571
2020-11-22 01:53:01	22.582	95.039
2020-11-22 02:53:01	22.081	94.551
2020-11-22 03:53:01	21.581	94.062
2020-11-22 04:53:01	21.581	94.062
2020-11-22 05:53:01	22.081	94.551
2020-11-22 06:53:01	21.581	94.062
2020-11-22 07:53:01	21.581	94.551
2020-11-22 08:53:01	22.081	92.585
2020-11-22 09:53:01	23.082	86.547
2020-11-22 10:53:01	23.082	83.45
2020-11-22 11:53:01	22.582	82.406
2020-11-22 12:53:01	24.082	81.356
2020-11-22 13:53:01	24.582	80.3
2020-11-22 14:53:01	24.082	76.558
2020-11-22 15:53:01	23.582	77.097
2020-11-22 16:53:01	24.082	79.238
2020-11-22 17:53:01	24.082	81.881
2020-11-22 18:53:01	23.082	86.035
2020-11-22 19:53:01	22.582	87.568
2020-11-22 20:53:01	22.081	89.089
2020-11-22 21:53:01	22.081	89.593
2020-11-22 22:53:01	21.581	92.585
2020-11-22 23:53:01	21.581	91.096
2020-11-23 00:53:01	21.581	92.09
2020-11-23 01:53:01	21.581	93.571
2020-11-23 02:53:01	21.081	93.079
2020-11-23 03:53:01	21.081	93.079
2020-11-23 04:53:01	21.081	94.062
2020-11-23 05:53:01	21.081	93.571
2020-11-23 06:53:01	21.081	93.571
2020-11-23 07:53:01	21.081	94.551
2020-11-23 08:53:01	21.581	89.593
2020-11-23 09:53:01	24.082	71.643
2020-11-23 10:53:01	25.582	71.089
2020-11-23 11:53:01	26.082	68.3
2020-11-23 12:53:01	26.082	66.609
2020-11-23 13:53:01	26.082	68.861
2020-11-23 14:53:01	26.082	67.174
2020-11-23 15:53:01	25.082	65.475
2020-11-23 16:53:01	25.082	70.534
2020-11-23 17:53:01	24.582	74.388
2020-11-23 18:53:01	23.082	76.018
2020-11-23 19:53:01	22.081	76.558
2020-11-23 20:53:01	21.581	78.705
2020-11-23 21:53:01	21.081	79.238
2020-11-23 22:53:01	20.58	79.77
2020-11-23 23:53:01	20.58	82.406
2020-11-24 00:53:01	20.58	83.97
2020-11-24 01:53:01	20.08	83.45
2020-11-24 02:53:01	20.08	82.406
2020-11-24 03:53:01	20.08	82.928
2020-11-24 04:53:01	20.08	82.928
2020-11-24 05:53:01	19.58	81.881
2020-11-24 06:53:01	19.58	83.97
2020-11-24 07:53:01	19.58	85.005
2020-11-24 08:53:01	20.08	80.3
2020-11-24 09:53:01	22.582	77.634
2020-11-24 10:53:01	25.582	73.842
2020-11-24 11:53:01	25.582	68.861
2020-11-24 12:53:01	26.582	67.738
2020-11-24 13:53:01	25.582	69.42
2020-11-24 14:53:01	25.582	70.534
2020-11-24 15:53:01	25.082	72.195
2020-11-24 16:53:01	24.582	71.089
2020-11-24 17:53:01	24.082	75.476
2020-11-24 18:53:01	23.082	79.77
2020-11-24 19:53:01	22.582	79.77
2020-11-24 20:53:01	22.582	76.558
2020-11-24 21:53:01	22.081	77.097
2020-11-24 22:53:01	22.582	78.705
2020-11-24 23:53:01	23.082	81.356
2020-11-25 00:53:01	23.582	78.705
2020-11-25 01:53:01	23.082	73.842
2020-11-25 02:53:01	23.082	79.77
2020-11-25 03:53:01	23.082	86.035
2020-11-25 04:53:01	23.082	86.035
2020-11-25 05:53:01	22.582	88.583
2020-11-25 06:53:01	23.082	92.09
2020-11-25 07:53:01	23.082	94.551
2020-11-25 08:53:01	23.082	79.238
2020-11-25 09:53:01	23.582	68.861
2020-11-25 10:53:01	24.082	59.714
2020-11-25 11:53:01	24.582	59.13
2020-11-25 12:53:01	25.582	59.13
2020-11-25 13:53:01	26.082	67.174
2020-11-25 14:53:01	25.582	63.762
2020-11-25 15:53:01	25.582	68.3
2020-11-25 16:53:01	25.082	75.476
2020-11-25 17:53:01	24.582	79.77
2020-11-25 18:53:01	24.082	86.547
2020-11-25 19:53:01	23.582	86.035
2020-11-25 20:53:01	23.582	88.583
2020-11-25 21:53:01	23.082	90.596
2020-11-25 22:53:01	23.082	91.594
2020-11-25 23:53:01	23.082	92.09
2020-11-26 00:53:01	23.082	94.062
2020-11-26 01:53:01	23.082	94.062
2020-11-26 02:53:01	22.582	95.526
2020-11-26 03:53:01	22.081	89.089
2020-11-26 04:53:01	21.581	90.095
2020-11-26 05:53:01	21.581	93.571
2020-11-26 06:53:01	21.081	95.039
2020-11-26 07:53:01	20.08	94.062
2020-11-26 08:53:01	20.58	93.079
2020-11-26 09:53:01	24.582	84.488
2020-11-26 10:53:01	26.582	84.488
2020-11-26 11:53:01	27.082	80.3
2020-11-26 12:53:01	27.582	80.828
2020-11-26 13:53:01	27.582	75.476
2020-11-26 14:53:01	27.082	73.842
2020-11-26 15:53:01	26.582	72.745
2020-11-26 16:53:01	26.082	78.17
2020-11-26 17:53:01	25.082	82.928
2020-11-26 18:53:01	24.082	88.583
2020-11-26 19:53:01	23.082	93.571
2020-11-26 20:53:01	22.582	94.062
2020-11-26 21:53:01	23.082	92.09
2020-11-26 22:53:01	22.582	93.079
2020-11-26 23:53:01	22.081	94.062
2020-11-27 00:53:01	21.581	94.551
2020-11-27 01:53:01	21.581	94.062
2020-11-27 02:53:01	21.581	94.551
2020-11-27 03:53:01	21.081	95.039
2020-11-27 04:53:01	22.081	95.039
2020-11-27 05:53:01	22.081	94.551
2020-11-27 06:53:01	21.581	95.039
2020-11-27 07:53:01	21.581	94.551
2020-11-27 08:53:01	21.581	91.096
2020-11-27 09:53:01	23.082	78.17
2020-11-27 10:53:01	25.082	72.195
2020-11-27 11:53:01	25.582	76.558
2020-11-27 12:53:01	25.082	79.238
2020-11-27 13:53:01	25.582	85.005
2020-11-27 14:53:01	25.582	78.705
2020-11-27 15:53:01	25.582	77.097
2020-11-27 16:53:01	25.582	83.97
2020-11-27 17:53:01	25.082	85.005
2020-11-27 18:53:01	23.582	89.089
2020-11-27 19:53:01	22.081	92.585
2020-11-27 20:53:01	21.581	90.095
2020-11-27 21:53:01	21.081	92.09
2020-11-27 22:53:01	21.081	93.571
2020-11-27 23:53:01	20.58	94.551
2020-11-28 00:53:01	20.08	95.039
2020-11-28 01:53:01	20.08	95.526
2020-11-28 02:53:01	20.08	94.551
2020-11-28 03:53:01	20.58	95.039
2020-11-28 04:53:01	20.08	95.039
2020-11-28 05:53:01	20.08	95.526
2020-11-28 06:53:01	19.58	94.551
2020-11-28 07:53:01	19.58	94.551
2020-11-28 08:53:01	20.58	89.593
2020-11-28 09:53:01	23.582	77.097
2020-11-28 10:53:01	25.582	73.294
2020-11-28 11:53:01	27.582	71.089
2020-11-28 12:53:01	26.082	69.978
2020-11-28 13:53:01	25.582	73.294
2020-11-28 14:53:01	24.582	74.388
2020-11-28 15:53:01	25.582	74.933
2020-11-28 16:53:01	25.582	76.558
2020-11-28 17:53:01	24.582	79.77
2020-11-28 18:53:01	23.582	86.035
2020-11-28 19:53:01	22.582	86.035
2020-11-28 20:53:01	22.081	89.089
2020-11-28 21:53:01	22.582	91.096
2020-11-28 22:53:01	22.081	92.585
2020-11-28 23:53:01	21.581	94.551
2020-11-29 00:53:01	21.081	92.09
2020-11-29 01:53:01	21.081	95.526
2020-11-29 02:53:01	20.58	95.526
2020-11-29 03:53:01	20.58	94.062
2020-11-29 04:53:01	20.58	94.551
2020-11-29 05:53:01	20.08	95.039
2020-11-29 06:53:01	20.58	95.526
2020-11-29 07:53:01	20.58	95.039
2020-11-29 08:53:01	21.581	89.593
2020-11-29 09:53:01	24.082	78.705
2020-11-29 10:53:01	26.082	72.745
2020-11-29 11:53:01	27.082	65.475
2020-11-29 12:53:01	27.582	69.42
2020-11-29 13:53:01	27.082	78.17
2020-11-29 14:53:01	26.582	79.77
2020-11-29 15:53:01	25.582	88.583
2020-11-29 16:53:01	25.582	91.096
2020-11-29 17:53:01	25.082	91.096
2020-11-29 18:53:01	24.082	93.079
2020-11-29 19:53:01	22.582	94.062
2020-11-29 20:53:01	22.582	92.09
2020-11-29 21:53:01	22.081	89.593
2020-11-29 22:53:01	21.581	85.005
2020-11-29 23:53:01	21.081	81.356
2020-11-30 00:53:01	21.081	88.077
2020-11-30 01:53:01	20.58	85.005
2020-11-30 02:53:01	20.58	84.488
2020-11-30 03:53:01	20.58	82.928
2020-11-30 04:53:01	20.08	89.089
2020-11-30 05:53:01	20.08	86.035
2020-11-30 06:53:01	20.08	85.521
2020-11-30 07:53:01	20.58	85.521
2020-11-30 08:53:01	21.581	77.097
2020-11-30 09:53:01	24.082	69.42
2020-11-30 10:53:01	26.082	68.3
2020-11-30 11:53:01	27.582	65.475
2020-11-30 12:53:01	28.581	59.13
2020-11-30 13:53:01	28.581	60.297
2020-11-30 14:53:01	26.582	57.369
2020-11-30 15:53:01	26.082	56.188
2020-11-30 16:53:01	23.582	57.958
2020-11-30 17:53:01	23.582	71.089
2020-11-30 18:53:01	23.582	75.476
2020-11-30 19:53:01	23.082	82.928
2020-11-30 20:53:01	23.082	88.077
2020-11-30 21:53:01	22.081	91.594
2020-11-30 22:53:01	21.081	85.521
2020-11-30 23:53:01	20.08	86.035
2020-12-01 00:53:01	19.58	92.585
2020-12-01 01:53:01	19.079	87.568
2020-12-01 02:53:01	18.579	86.035
2020-12-01 03:53:01	18.078	85.521
2020-12-01 04:53:01	17.077	88.077
2020-12-01 05:53:01	16.076	85.005
2020-12-01 06:53:01	15.575	94.551
2020-12-01 07:53:01	15.074	90.095
2020-12-01 08:53:01	14.573	84.488
2020-12-01 09:53:01	16.076	76.018
2020-12-01 10:53:01	17.077	68.3
2020-12-01 11:53:01	18.078	68.3
2020-12-01 12:53:01	19.079	64.905
2020-12-01 13:53:01	18.579	59.714
2020-12-01 14:53:01	18.579	58.545
2020-12-01 15:53:01	18.579	62.036
2020-12-01 16:53:01	17.578	64.334
2020-12-01 17:53:01	17.077	71.089
2020-12-01 18:53:01	14.573	78.17
2020-12-01 19:53:01	13.071	81.881
2020-12-01 20:53:01	12.57	85.005
2020-12-01 21:53:01	11.568	89.089
2020-12-01 22:53:01	11.066	89.089
2020-12-01 23:53:01	11.066	90.095
2020-12-02 00:53:01	10.565	92.09
2020-12-02 01:53:01	10.565	92.09
2020-12-02 02:53:01	10.565	93.571
2020-12-02 03:53:01	10.565	92.585
2020-12-02 04:53:01	10.565	92.585
2020-12-02 05:53:01	10.565	94.551
2020-12-02 06:53:01	10.565	96.494
2020-12-02 07:53:01	10.565	97.936
2020-12-02 08:53:01	11.066	70.534
2020-12-02 09:53:01	15.074	62.613
2020-12-02 10:53:01	18.078	64.905
2020-12-02 11:53:01	20.08	64.334
2020-12-02 12:53:01	21.581	57.958
2020-12-02 13:53:01	22.081	59.13
2020-12-02 14:53:01	22.081	61.458
2020-12-02 15:53:01	22.081	60.878
2020-12-02 16:53:01	21.081	63.762
2020-12-02 17:53:01	20.58	65.475
2020-12-02 18:53:01	19.079	68.861
2020-12-02 19:53:01	17.578	66.609
2020-12-02 20:53:01	16.576	68.861
2020-12-02 21:53:01	16.076	67.174
2020-12-02 22:53:01	15.074	72.195
2020-12-02 23:53:01	15.074	68.3
2020-12-03 00:53:01	14.573	68.861
2020-12-03 01:53:01	14.573	70.534
2020-12-03 02:53:01	14.072	78.17
2020-12-03 03:53:01	14.072	73.294
2020-12-03 04:53:01	14.573	79.77
2020-12-03 05:53:01	14.573	87.568
2020-12-03 06:53:01	14.072	92.585
2020-12-03 07:53:01	13.571	92.585
2020-12-03 08:53:01	15.074	91.096
2020-12-03 09:53:01	20.58	74.388
2020-12-03 10:53:01	22.081	69.42
2020-12-03 11:53:01	22.081	64.334
2020-12-03 12:53:01	22.081	64.334
2020-12-03 13:53:01	23.582	63.762
2020-12-03 14:53:01	23.082	66.043
2020-12-03 15:53:01	23.082	66.043
2020-12-03 16:53:01	22.582	71.643
2020-12-03 17:53:01	22.081	78.17
2020-12-03 18:53:01	21.581	86.547
2020-12-03 19:53:01	20.58	89.089
2020-12-03 20:53:01	21.081	91.594
2020-12-03 21:53:01	21.581	93.079
2020-12-03 22:53:01	21.581	92.585
2020-12-03 23:53:01	21.581	92.585
2020-12-04 00:53:01	21.581	93.079
2020-12-04 01:53:01	21.081	95.526
2020-12-04 02:53:01	20.58	95.039
2020-12-04 03:53:01	20.08	94.062
2020-12-04 04:53:01	20.58	95.039
2020-12-04 05:53:01	20.08	95.039
2020-12-04 06:53:01	19.079	93.571
2020-12-04 07:53:01	18.579	94.551
2020-12-04 08:53:01	18.579	94.062
2020-12-04 09:53:01	20.08	83.97
2020-12-04 10:53:01	22.081	71.643
2020-12-04 11:53:01	23.082	70.534
2020-12-04 12:53:01	25.082	66.043
2020-12-04 13:53:01	25.082	67.738
2020-12-04 14:53:01	25.082	66.609
2020-12-04 15:53:01	24.582	68.861
2020-12-04 16:53:01	24.082	70.534
2020-12-04 17:53:01	23.082	77.634
2020-12-04 18:53:01	22.081	87.059
2020-12-04 19:53:01	21.081	89.089
2020-12-04 20:53:01	20.58	88.583
2020-12-04 21:53:01	19.58	91.594
2020-12-04 22:53:01	19.58	93.571
2020-12-04 23:53:01	19.58	94.062
2020-12-05 00:53:01	19.58	94.551
2020-12-05 01:53:01	19.58	94.551
2020-12-05 02:53:01	19.58	94.062
2020-12-05 03:53:01	19.58	94.062
2020-12-05 04:53:01	19.58	93.079
2020-12-05 05:53:01	19.58	93.079
2020-12-05 06:53:01	19.58	93.079
2020-12-05 07:53:01	19.58	90.095
2020-12-05 08:53:01	20.08	79.77
2020-12-05 09:53:01	21.081	73.294
2020-12-05 10:53:01	24.582	69.42
2020-12-05 11:53:01	26.582	69.42
2020-12-05 12:53:01	27.582	69.42
2020-12-05 13:53:01	28.081	76.018
2020-12-05 14:53:01	27.582	77.097
2020-12-05 15:53:01	27.082	78.705
2020-12-05 16:53:01	26.582	82.406
2020-12-05 17:53:01	26.582	86.035
2020-12-05 18:53:01	24.582	85.521
2020-12-05 19:53:01	23.082	88.583
2020-12-05 20:53:01	22.582	90.095
2020-12-05 21:53:01	22.582	89.089
2020-12-05 22:53:01	22.081	89.089
2020-12-05 23:53:01	22.081	90.596
2020-12-06 00:53:01	21.581	92.585
2020-12-06 01:53:01	21.081	92.585
2020-12-06 02:53:01	20.58	93.079
2020-12-06 03:53:01	20.58	94.062
2020-12-06 04:53:01	20.08	94.062
2020-12-06 05:53:01	19.58	93.079
2020-12-06 06:53:01	19.58	95.526
2020-12-06 07:53:01	19.58	96.011
2020-12-06 08:53:01	20.08	95.526
2020-12-06 09:53:01	22.582	93.079
2020-12-06 10:53:01	24.582	92.09
2020-12-06 11:53:01	26.082	82.406
2020-12-06 12:53:01	26.582	80.3
2020-12-06 13:53:01	27.582	74.933
2020-12-06 14:53:01	26.082	74.388
2020-12-06 15:53:01	25.582	76.018
2020-12-06 16:53:01	25.582	82.406
2020-12-06 17:53:01	25.082	81.356
2020-12-06 18:53:01	24.082	83.45
2020-12-06 19:53:01	23.582	88.077
2020-12-06 20:53:01	23.082	88.583
2020-12-06 21:53:01	23.082	81.881
2020-12-06 22:53:01	23.082	81.356
2020-12-06 23:53:01	23.082	87.059
2020-12-07 00:53:01	22.582	87.568
2020-12-07 01:53:01	22.582	86.547
2020-12-07 02:53:01	22.081	87.059
2020-12-07 03:53:01	22.582	83.97
2020-12-07 04:53:01	22.582	85.005
2020-12-07 05:53:01	21.581	82.928
2020-12-07 06:53:01	20.08	84.488
2020-12-07 07:53:01	18.579	83.45
2020-12-07 08:53:01	17.578	78.705
2020-12-07 09:53:01	18.078	71.643
2020-12-07 10:53:01	19.079	63.762
2020-12-07 11:53:01	20.58	60.878
2020-12-07 12:53:01	24.082	59.714
2020-12-07 13:53:01	24.082	62.613
2020-12-07 14:53:01	24.582	49.587
2020-12-07 15:53:01	24.082	53.209
2020-12-07 16:53:01	22.582	56.779
2020-12-07 17:53:01	22.081	69.42
2020-12-07 18:53:01	20.58	76.018
2020-12-07 19:53:01	19.58	80.828
2020-12-07 20:53:01	18.579	83.45
2020-12-07 21:53:01	18.579	84.488
2020-12-07 22:53:01	17.077	81.356
2020-12-07 23:53:01	16.076	83.97
2020-12-08 00:53:01	15.575	88.583
2020-12-08 01:53:01	15.575	85.521
2020-12-08 02:53:01	15.575	90.095
2020-12-08 03:53:01	15.074	90.095
2020-12-08 04:53:01	14.072	92.585
2020-12-08 05:53:01	12.57	86.547
2020-12-08 06:53:01	12.069	93.079
2020-12-08 07:53:01	11.066	90.095
2020-12-08 08:53:01	11.568	66.609
2020-12-08 09:53:01	14.573	53.209
2020-12-08 10:53:01	15.575	51.405
2020-12-08 11:53:01	16.576	50.194
2020-12-08 12:53:01	16.076	51.405
2020-12-08 13:53:01	17.578	49.587
2020-12-08 14:53:01	16.576	48.368
2020-12-08 15:53:01	16.576	55.001
2020-12-08 16:53:01	16.576	60.297
2020-12-08 17:53:01	15.575	69.42
2020-12-08 18:53:01	14.072	81.356
2020-12-08 19:53:01	12.57	86.035
2020-12-08 20:53:01	12.069	90.596
2020-12-08 21:53:01	11.568	96.011
2020-12-08 22:53:01	11.066	94.551
2020-12-08 23:53:01	11.066	96.976
2020-12-09 00:53:01	10.565	100.31
2020-12-09 01:53:01	10.064	96.494
2020-12-09 02:53:01	10.064	97.936
2020-12-09 03:53:01	10.064	100.31
2020-12-09 04:53:01	10.064	99.838
2020-12-09 05:53:01	9.563	99.364
2020-12-09 06:53:01	9.062	99.838
2020-12-09 07:53:01	8.56	96.494
2020-12-09 08:53:01	9.062	98.89
2020-12-09 09:53:01	12.57	72.195
2020-12-09 10:53:01	15.074	62.613
2020-12-09 11:53:01	16.576	59.13
2020-12-09 12:53:01	17.578	71.089
2020-12-09 13:53:01	17.578	69.978
2020-12-09 14:53:01	18.078	55.001
2020-12-09 15:53:01	18.078	60.297
2020-12-09 16:53:01	17.077	69.42
2020-12-09 17:53:01	16.076	81.356
2020-12-09 18:53:01	13.571	86.035
2020-12-09 19:53:01	11.568	90.596
2020-12-09 20:53:01	10.565	96.011
2020-12-09 21:53:01	9.563	94.551
2020-12-09 22:53:01	9.062	96.976
2020-12-09 23:53:01	9.062	100.31
2020-12-10 00:53:01	9.062	96.494
2020-12-10 01:53:01	9.062	97.936
2020-12-10 02:53:01	9.062	100.31
2020-12-10 03:53:01	9.062	99.838
2020-12-10 04:53:01	9.062	99.364
2020-12-10 05:53:01	8.56	99.838
2020-12-10 06:53:01	8.56	96.494
2020-12-10 07:53:01	8.56	98.89
2020-12-10 08:53:01	9.563	72.195
2020-12-10 09:53:01	14.573	62.613
2020-12-10 10:53:01	18.078	59.13
2020-12-10 11:53:01	19.079	71.089
2020-12-10 12:53:01	20.58	69.978

## Sheet: Labor breakdown
Cylinders
Task	mean min/cage
Select plants from black tarp, dunk, and rinse	8
Trimming to fit into cylinder, add moss, write labels	10
Collect and count thrips for inocculation, add thrips	10
Routine watering	0.9
Trimming to fit into opaque jar, harvest of early-emerging thrips, swapping cylinder for opaque jar	45
Harvesting main thrips emergence from floral tubes and adding new cuttings to tubes	16.5
Cylinder breakdown, washing cylinders and opaque jars, final plant trimming, and plant return to black tarp	20		mean thrips/cage		min/thrips		min/thousand thrips		h/thousand thrips
Total min/cage	110.4		368		0.3		300		5
Boxes
Task	mean min/cage
Select plants from black tarp, dunk, and rinse	10
Trim leaves, add moss, fit into boxes, and write labels	27
Collect and count thrips for inocculation, add thrips	10
Routine watering	1.8
Making pupal refugia and routine misting	10
Trimming plants to prepare for emergence	30
Harvesting thrips from leaves still alive	99
Box breakdown, wiping out box, final plant trimming, and plant return to black tarp	20		mean thrips/cage		min/thrips		min/thousand thrips		h/thousand thrips
Total min/cage	207.8		679		0.306038		306.038		5.10064
Screen cages
Task	mean min/cage
Select plants from black tarp, dunk, and rinse	40
Prepare screen cage, gather trays, write labels	30
Collect and count thrips for inocculation, add thrips	85
Add moss to pots and trays	23
Routine watering	42.5
Trimming plants once damaged and most larvae have descneded to pupate	50
Preparing, hanging, harvesting, and replacing 1.5 L plants once adults start to emerge	117
Removal of 11.4 L plants to black tarp, removal of dried trimmings, moss disposal or baking, sweeping/vacuuming out cage	43		mean thrips/cage		min/thrips		min/thousand thrips		h/thousand thrips
Total min/cage	430.5		13864		0.0310516		31.0516		0.517527
